# Supplementary material for: Passive Transfer of Animal-Derived Polyclonal Hyperimmune Antibodies Provides Protection of Mice from Lethal Lassa Virus Infection
Source: MDPI journal article supplement (doi:10.3390/v15071436), 2023-06-26
Supplement: s1 [file s1]

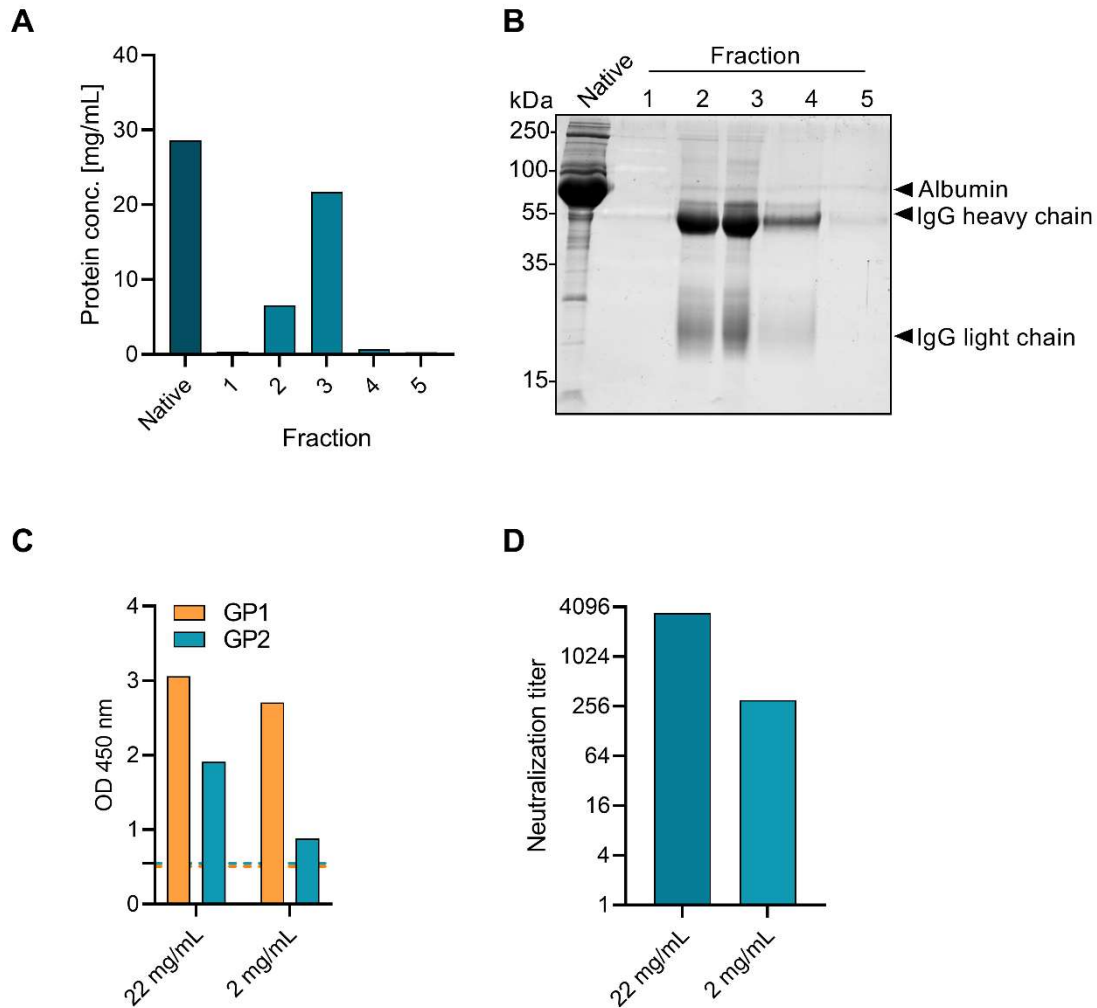

**Figure S1.** Purification and functional analysis of anti-LASV GP antibodies. **A** Total IgG was purified from rabbit hyperimmune sera using protein A affinity chromatography. The antibody concentration was determined using Pierce BCA Protein Assay Kit. **B** Purity of the IgG preparation was assessed by SDS-PAGE and SYPRO Ruby protein gel staining using 3  $\mu$ g of total protein from each fraction. **C** IgG antibody binding responses against LASV GP were measured by GP subunit ELISA using GP1 and GP2 of LASV strain GA391 recombinantly expressed in HEK293 cells. **D** Neutralization titers of affinity-purified IgG were determined by replication-competent vesicular stomatitis virus (VSV) expressing LASV GP (VSV $\Delta$ G/LASVGP).
