# Supplementary material for: Passive Transfer of Animal-Derived Polyclonal Hyperimmune Antibodies Provides Protection of Mice from Lethal Lassa Virus Infection
Source: MDPI journal article supplement (doi:10.3390/v15071436), 2023-06-26
Supplement: s1 [file s1]

**Supplementary Table S1: Overview of score points for daily monitoring of mice**

| Category                   | Description                                          | Score | Humane end point |
|----------------------------|------------------------------------------------------|-------|------------------|
| Appearance                 | Smooth fur                                           | 0     | –                |
|                            | Patches of hair piloerected                          | 1     | –                |
|                            | Majority of fur piloerected                          | 2     | –                |
| Level of consciousness     | Mouse shows normal activity                          | 0     | –                |
|                            | Mouse shows reduced activity                         | 1     | –                |
|                            | Mouse only moves when provoked                       | 2     | –                |
|                            | Mouse remains stationary when provoked               | 4     | Yes              |
| Eyes                       | Open, clear                                          | 0     | –                |
|                            | Milky secretion at one or both eyes                  | 2     | –                |
|                            | Both eyes closed and milky secretion                 | 3     | –                |
| Respiration                | Normal                                               | 0     | –                |
|                            | Laboured                                             | 1     | –                |
|                            | Gasping                                              | 3     | Yes              |
| Weight loss                | Weight loss <10% of starting weight                  | 0     | –                |
|                            | Weight loss 10% – 19.9% of starting weight           | 1     | –                |
|                            | Weight loss greater 20% of starting weight           | 2     | Yes              |
| Neurological Abnormalities | Seizures, paralysis, disorientation, self-mutilation | 3     | Yes              |
| Body temperature           | Normal: 36.1 – 37.9 °C                               | 0     | –                |
|                            | 38.0 – 39.9 °C                                       | 1     | –                |
|                            | 33.0 – 36.0 °C                                       | 1     | –                |
|                            | 30.1– 32.9 °C                                        | 2     | –                |
|                            | ≥40.0 °C                                             | 2     | –                |
|                            | ≤30.0 °C                                             | 3     | Yes              |
